# Supplementary material for: A one-step aqueous route to prepare polyacrylonitrile-based hydrogels with excellent ionic conductivity and extreme low temperature tolerance
Source: Royal Society of Chemistry journal article supplement (doi:10.1039/d0ta08177a), 2020-01-01
Supplement: d0ta08177a2.pdf [file d0ta08177a2.pdf]

**SUPPORTING INFORMATION**

**One-step aqueous route to prepare polyacrylonitrile-based  
hydrogel with excellent ionic conductivity and extreme  
low-temperature tolerance**

Chi Jiang, Tang Zhu, Huichao Liu\*, Guang Yang, Zhipeng He, Minjie Wang, Muwei

Ji, Guangtao Cong, Jiali Yu, Caizhen Zhu\*, Jian Xu\*

Institute of Low-dimensional Materials Genome Initiative, College of Chemistry and  
Environmental Engineering, Shenzhen University, Shenzhen, Guangdong, 518060,  
P.R. China.

\*Corresponding authors: E-mail: huichaoliu@szu.edu.cn (Huichao Liu);

caizhen@szu.edu.cn (Caizhen Zhu); jxu@iccas.ac.cn (Jian Xu).

Tel./Fax: +86-755-26535427.

**Table S1.** The composition of different AAH.

| Hydrogels  | AN<br>(g) | AMPS<br>(g) | MBAA<br>(g) | ZnCl <sub>2</sub><br>(g) | H <sub>2</sub> O<br>(g) | APS<br>(g) | TEMED<br>( $\mu$ L) | Gel | Water content <sup>a)</sup><br>(%) |
|------------|-----------|-------------|-------------|--------------------------|-------------------------|------------|---------------------|-----|------------------------------------|
| AAH-90-0   | 1.8       | 0.2         | 0           | 10.0                     | 8.0                     | 0.02       | 16                  | No  | —                                  |
| AAH-90-0.2 | 1.8       | 0.2         | 0.004       | 10.0                     | 8.0                     | 0.02       | 16                  | Yes | 36.02 $\pm$ 0.19                   |
| AAH-90-0.4 | 1.8       | 0.2         | 0.008       | 10.0                     | 8.0                     | 0.02       | 16                  | Yes | 35.29 $\pm$ 0.11                   |
| AAH-90-0.6 | 1.8       | 0.2         | 0.012       | 10.0                     | 8.0                     | 0.02       | 16                  | Yes | 35.00 $\pm$ 0.25                   |
| AAH-90-0.8 | 1.8       | 0.2         | 0.016       | 10.0                     | 8.0                     | 0.02       | 16                  | Yes | 35.20 $\pm$ 0.33                   |
| AAH-60-0.4 | 1.2       | 0.8         | 0.008       | 10.0                     | 8.0                     | 0.02       | 16                  | Yes | 42.17 $\pm$ 0.85                   |
| AAH-70-0.4 | 1.4       | 0.6         | 0.008       | 10.0                     | 8.0                     | 0.02       | 16                  | Yes | 41.85 $\pm$ 0.46                   |
| AAH-80-0.4 | 1.6       | 0.4         | 0.008       | 10.0                     | 8.0                     | 0.02       | 16                  | Yes | 39.77 $\pm$ 1.31                   |

<sup>a)</sup> The water content (wt%) is defined as the mass ratio of the weight of water in the hydrogels to the total weight of the hydrogels.

**Table S2.** Summary of anti-freezing hydrogels.

| References | Anti-freezing components   | Conductive agents                       | Temperature tolerance /°C | Conductivity at low temperature / (S m <sup>-1</sup> ) |
|------------|----------------------------|-----------------------------------------|---------------------------|--------------------------------------------------------|
| This work  | ZnCl <sub>2</sub>          | ZnCl <sub>2</sub>                       | -50                       | 1.16                                                   |
| 14         | Glycerol                   | Polyaniline                             | -20                       | 0.32                                                   |
| 17         | Na <sup>+</sup>            | Sodium polyacrylate                     | -35                       | 0.1                                                    |
| 21         | CaCl <sub>2</sub>          | CaCl <sub>2</sub>                       | -57                       | ≈0.30                                                  |
| 23         | EG <sup>a)</sup>           | MXene <sup>b)</sup>                     | -40                       | ≈0.002                                                 |
| 25         | Glycerol                   | MAANa <sup>c)</sup> & DMC <sup>d)</sup> | -20                       | 1.00                                                   |
| 26         | EG+ glycerol               | KCl                                     | -18                       | Not mentioned                                          |
| 27         | EG                         | LiCl                                    | -40                       | ≈0.2                                                   |
| 28         | Glycerol                   | ZnSO <sub>4</sub> +MnSO <sub>4</sub>    | -20                       | 1.45                                                   |
| 29         | EG                         | H <sub>2</sub> SO <sub>4</sub>          | -40                       | 0.45                                                   |
| 30         | EG                         | PEDOT: PSS <sup>e)</sup>                | -40                       | ≈0.0015                                                |
| 31         | Glycerol, glycol, Sorbitol | N/A                                     | -70 to -45                | N/A                                                    |
| 32         | EG                         | LiCl                                    | -20                       | 0.071                                                  |
| 43         | EG                         | H <sub>2</sub> SO <sub>4</sub>          | -40                       | 0.48                                                   |

<sup>a)</sup> Ethylene glycol; <sup>b)</sup> transition-metal carbide and carbonitride; <sup>c)</sup> Sodium methacrylate;

<sup>d</sup>[2-(methacryloyloxy)-ethyl] trimethyl ammonium chloride; <sup>e</sup>Poly(3,4-ethylenedioxythiophene):polystyrene sulfonate.

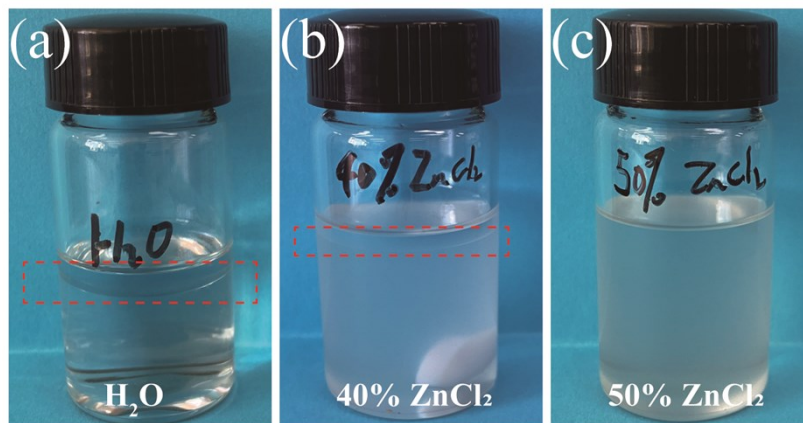

**Figure S1.** The dissolution ability of AN in pure water (a), 40 wt% (b) and 50 wt% (c) ZnCl<sub>2</sub> aqueous solutions.

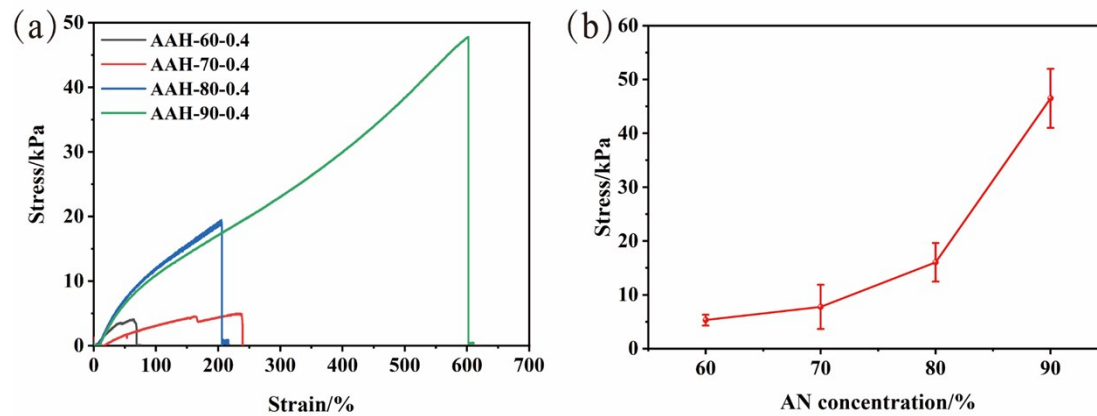

**Figure S2.** The tensile stress-strain curves (a) and the corresponding tensile stress (b) of the AAH with different AN concentration.

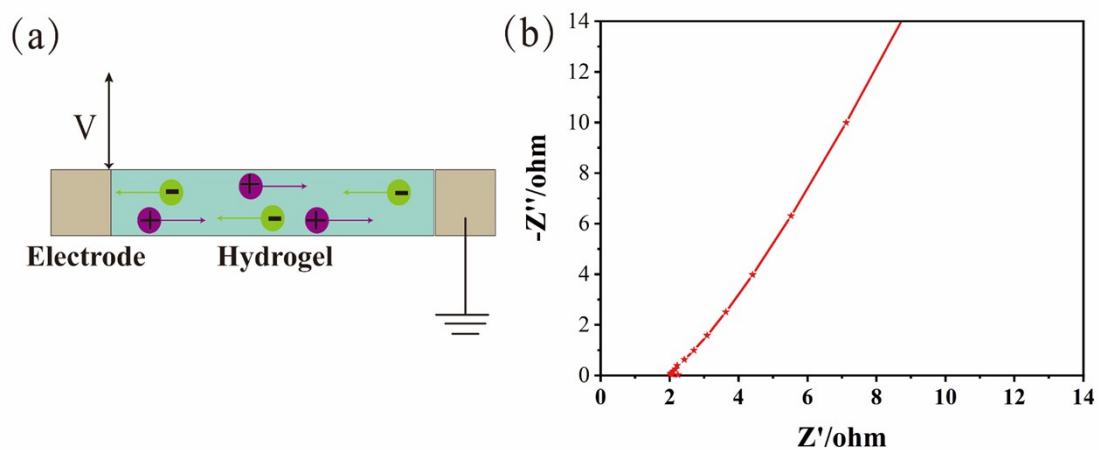

**Figure S3.** (a) Schematic illustration of conductivity of the AAH via ionic migration.

(b) The Nyquist plot of the AAH-90-0.4 at room temperature.

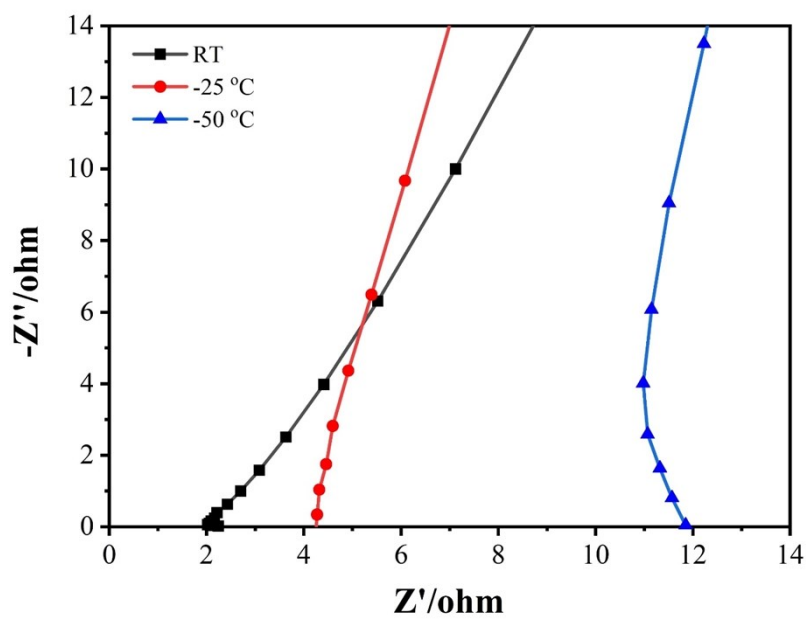

**Figure S4.** The Nyquist plot of the AAH at different temperatures.
